# Supplementary material for: Effects of Plant and Soil Characteristics on Phyllosphere and Rhizosphere Fungal Communities During Plant Development in a Copper Tailings Dam
Source: PubMed Central journal article supplement (PMC7550642; doi:10.3389/fmicb.2020.556002), 2020-09-29
Supplement: Data_Sheet_1.pdf [file Data_Sheet_1.pdf]

**Effects of plant and soil characteristics on phyllosphere and rhizosphere fungal communities  
during plant development in a copper tailings dam**

Tong Jia\*, Yushan Yao, Tingyan Guo, Ruihong Wang, Baofeng Chai

Shanxi Key Laboratory of Ecological Restoration on Loess Plateau, Institute of Loess Plateau,

Shanxi University, Taiyuan 030006, P.R. China;

\*Corresponding author. Email: [jiatong@sxu.edu.cn](mailto:jiatong@sxu.edu.cn)

Address: No. 92 Wucheng Road, Xiaodian district, Taiyuan, Shanxi 030006, P.R. China. Tel.:

+86-155-1369-4458

## Supplemental Material

**Table S1**

Mean values ( $\pm$  SE) of *Bothriochloa ischaemum* properties in copper tailings dam. Significant differences between sites (Duncan test,  $P < 0.05$ ) are denoted with letters (a > b > c).

|            | Seedling            | Tiller              | Mature              |
|------------|---------------------|---------------------|---------------------|
| TN_Leaf    | 3.213 $\pm$ 0.758b  | 93.748 $\pm$ 4.955a | 5.199 $\pm$ 1.844b  |
| TC_Leaf    | 47.158 $\pm$ 2.832b | 45.319 $\pm$ 0.313b | 78.431 $\pm$ 1.821a |
| C/N_Leaf   | 15.819 $\pm$ 2.462a | 0.486 $\pm$ 0.028b  | 18.478 $\pm$ 4.912a |
| TS_Leaf    | 1.009 $\pm$ 0.702   | 0.157 $\pm$ 0.009   | 0.519 $\pm$ 0.184   |
| TN_Sheath  | 0.817 $\pm$ 0.031b  | 41.381 $\pm$ 7.046a | 1.329 $\pm$ 0.085b  |
| TC_Sheath  | 42.720 $\pm$ 0.462a | 33.346 $\pm$ 0.656b | 6.631 $\pm$ 0.260c  |
| C/N_Sheath | 52.458 $\pm$ 2.341a | 0.854 $\pm$ 0.148c  | 5.056 $\pm$ 0.537b  |
| TS_Sheath  | 0.180 $\pm$ 0.022b  | 0.130 $\pm$ 0.008b  | 0.802 $\pm$ 0.093a  |
| TN_Root    | 0.985 $\pm$ 0.016b  | 9.392 $\pm$ 3.120a  | 0.851 $\pm$ 0.035b  |
| TC_Root    | 44.337 $\pm$ 0.032b | 44.832 $\pm$ 0.096a | 15.330 $\pm$ 0.277c |
| C/N_Root   | 45.038 $\pm$ 0.693a | 6.949 $\pm$ 3.319c  | 18.089 $\pm$ 0.871b |
| TS_Root    | 0.627 $\pm$ 0.154a  | 0.244 $\pm$ 0.009b  | 0.032 $\pm$ 0.005c  |

Abbreviations mean total nitrogen (TN), total carbon (TC), total sulfur (TS), and the ratio of carbon and nitrogen (C/N); the unit of TN, TC and TS,  $\text{g}\cdot\text{kg}^{-1}$ .

**Table S2**

Soil chemical properties of copper tailings dam. Values represent mean with standard error in parenthesis. Significant differences between sites (Duncan test,  $P < 0.05$ ) are denoted with letters (a > b > c).

|                                                        | Seedling       | Tiller        | Mature        |
|--------------------------------------------------------|----------------|---------------|---------------|
| SWC (%)                                                | 0.841±0.036c   | 15.499±1.260b | 86.162±0.213a |
| pH                                                     | 8.203±0.020b   | 8.913±0.019a  | 8.113±0.029c  |
| NH <sub>4</sub> <sup>+</sup> -N (mg·kg <sup>-1</sup> ) | 0.156±0.029bc  | 0.273±0.116ab | 0.427±0.075a  |
| NO <sub>3</sub> <sup>-</sup> -N (mg·kg <sup>-1</sup> ) | 0.064±0.006c   | 0.220±0.019a  | 0.134±0.007b  |
| NO <sub>2</sub> <sup>-</sup> -N (mg·kg <sup>-1</sup> ) | 0.006±0.001b   | 0.008±0.001b  | 0.011±0.002a  |
| TN (g·kg <sup>-1</sup> )                               | 0.082±0.001a   | 0.029±0.003c  | 0.047±0.005b  |
| TC (g·kg <sup>-1</sup> )                               | 6.017±0.919a   | 0.627±0.018b  | 1.033±0.041b  |
| C/N                                                    | 73.516±11.817a | 21.681±1.164b | 22.058±1.474b |
| TS (g·kg <sup>-1</sup> )                               | 0.459±0.294a   | 0.065±0.002b  | 0.144±0.017ab |
| ST (°C)                                                | 23.900±0.473c  | 28.833±0.698a | 26.867±0.484b |
| Salinity (mg·L <sup>-1</sup> )                         | 0.000±0.000c   | 14.333±3.844b | 31.667±1.202a |
| EC (μs·cm <sup>-1</sup> )                              | 0.000±0.000c   | 26.667±7.219b | 57.667±1.667a |

Abbreviations mean soil water content (SWC), ammonium nitrogen (NH<sub>4</sub><sup>+</sup>-N), nitrate nitrogen (NO<sub>3</sub><sup>-</sup>-N), nitrite nitrogen (NO<sub>2</sub><sup>-</sup>-N), total nitrogen (TN), total carbon (TC), total sulfur (TS), the ratio of carbon and nitrogen (C/N), soil temperature (ST), and electrical conductivity (EC).

**Table S3**

Network properties obtained through network analysis from phyllosphere and rhizosphere fungal communities.

|              | Nodes | Edges | Average Degree | Network Diameter | Clustering Coefficient | Average Path Length |
|--------------|-------|-------|----------------|------------------|------------------------|---------------------|
| Phyllosphere | 82    | 416   | 10.146         | 9                | 0.685                  | 3.218               |
| Rhizosphere  | 122   | 626   | 10.262         | 8                | 0.637                  | 3.574               |

**Table S4**

Dominant keystone species from phyllosphere and rhizosphere fungal community structures.

|              | Phylum        | Family                              | Betweenness centrality |
|--------------|---------------|-------------------------------------|------------------------|
| Phyllosphere | Ascomycota    | Davidiellaceae                      | 529.80                 |
|              | Ascomycota    | norank_o_Trichosphaeriales          | 404.33                 |
|              | Ascomycota    | norank_o_Pleosporales               | 388.47                 |
|              | Ascomycota    | Trichocomaceae                      | 325.55                 |
|              | Ascomycota    | Montagnulaceae                      | 280.90                 |
|              | Ascomycota    | Myxotrichaceae                      | 268.00                 |
|              | Ascomycota    | Stictidaceae                        | 263.18                 |
|              | Ascomycota    | Dothioraceae                        | 262.64                 |
|              | Ascomycota    | Mycosphaerellaceae                  | 216.06                 |
|              | Basidiomycota | Marasmiaceae                        | 196.84                 |
| Rhizosphere  | Ascomycota    | unclassified_o_Sordariales          | 775.03                 |
|              | Ascomycota    | unclassified_c_Dothideomycetes      | 749.90                 |
|              | Ascomycota    | Herpotrichiellaceae                 | 622.33                 |
|              | Ascomycota    | unclassified_p_Ascomycota           | 566.71                 |
|              | Ascomycota    | Lasiosphaeriaceae                   | 552.13                 |
|              | Ascomycota    | norank_p_Ascomycota                 | 519.77                 |
|              | Basidiomycota | unclassified_c_Agaricostilbomycetes | 532.27                 |
|              | Basidiomycota | unclassified_o_Sebacinales          | 530.93                 |
|              | Basidiomycota | Ustilaginaceae                      | 502.57                 |
|              | Basidiomycota | Typhulaceae                         | 452.00                 |

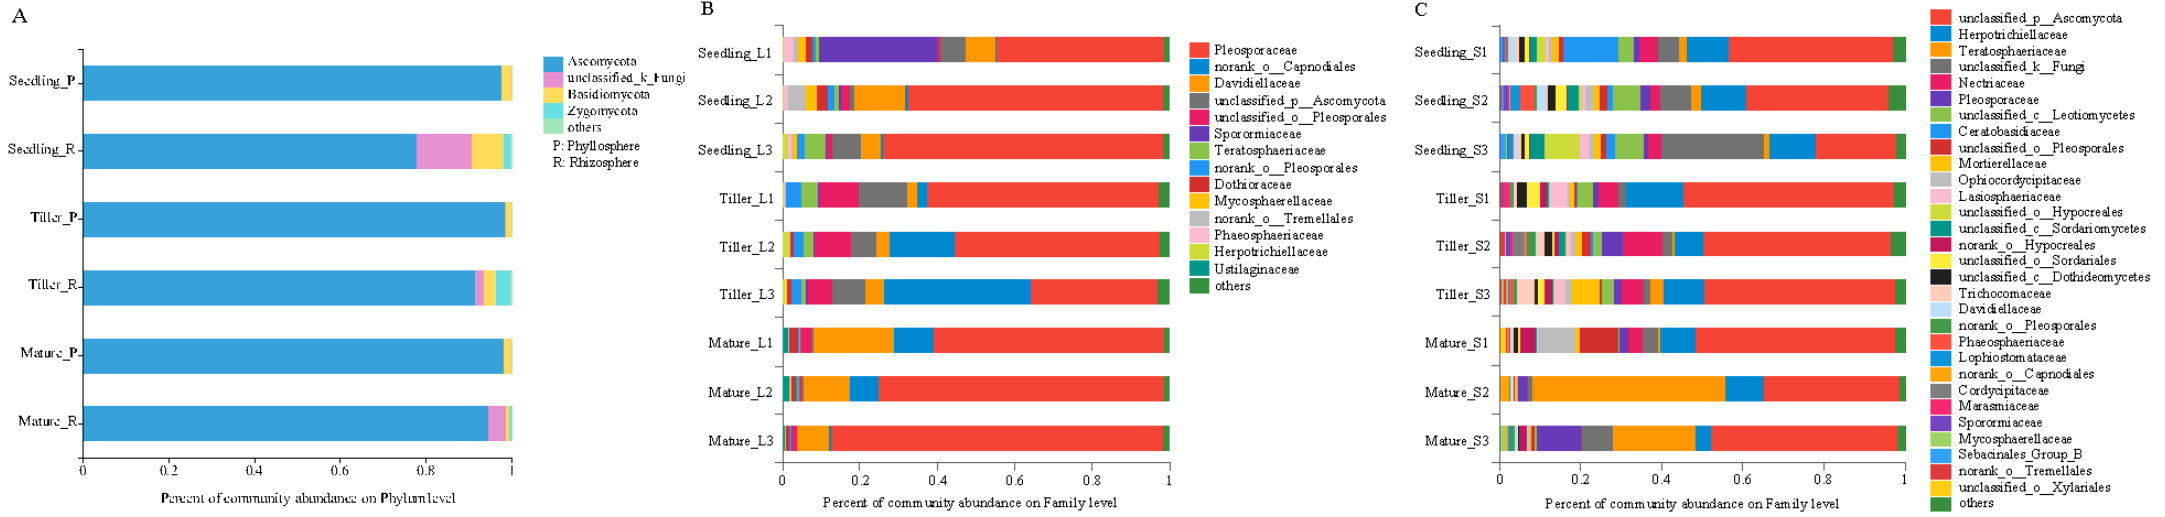

**FIGURE S1** Relative abundance of fungal phyla (A), dominant phyllosphere (B) and rhizosphere (C) fungal community families (with average relative abundance > 1%) among different plant growth stages.

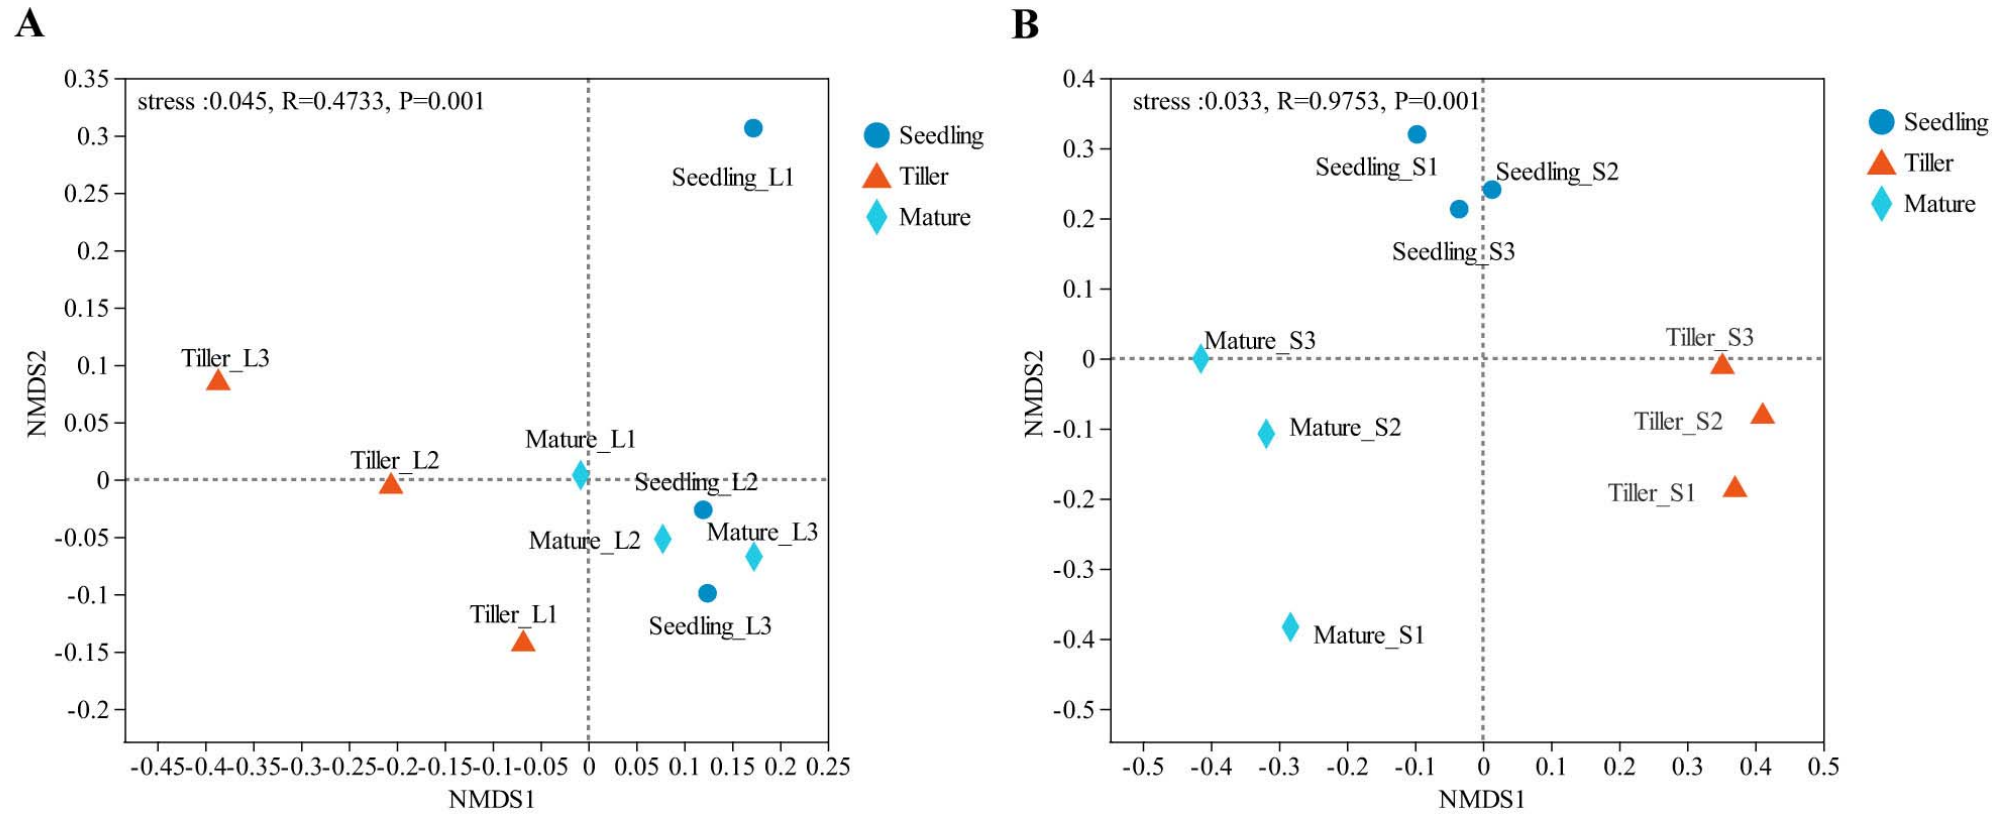

**FIGURE S2** Non-metric multidimensional scaling (NMDS) of phyllosphere (A) and rhizosphere (B) samples among plant development processes based on the relative abundance of fungal OTUs.

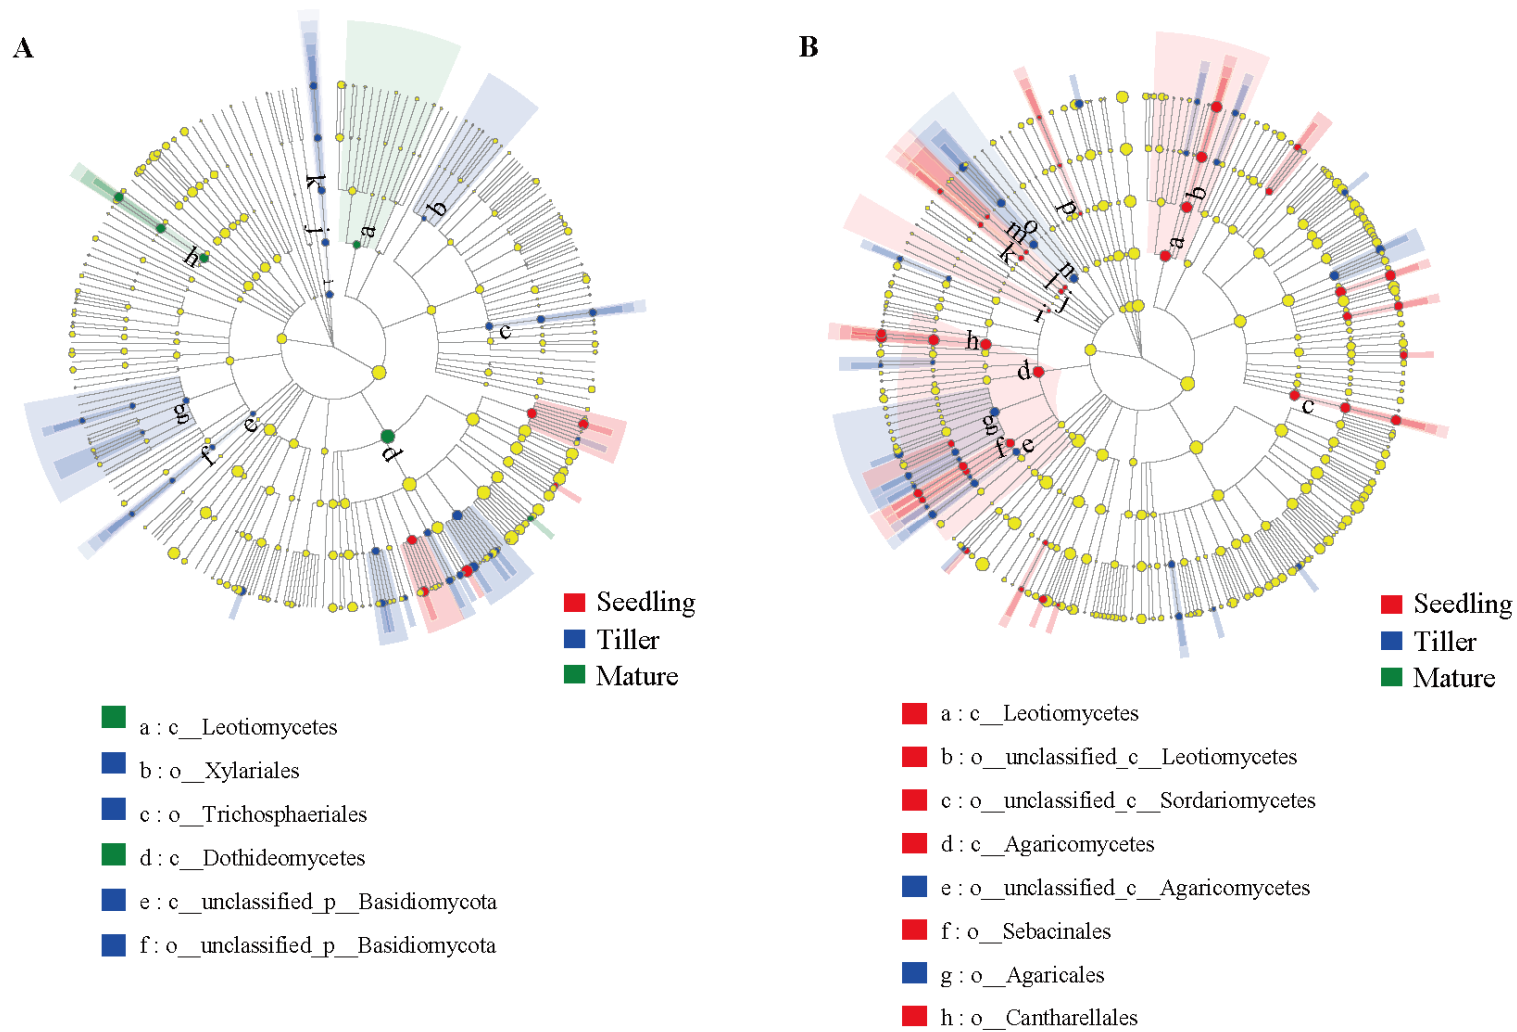

**FIGURE S3** Cladogram showing the phylogenetic distribution of phyllosphere (A) and rhizosphere (B) fungal communities from different development stages. Different-colored regions represent different constituents (red, seedling; green, mature; blue, tiller). Circles indicate phylogenetic levels from phylum to genus. The diameter of each circle is proportional to the abundance of the group.

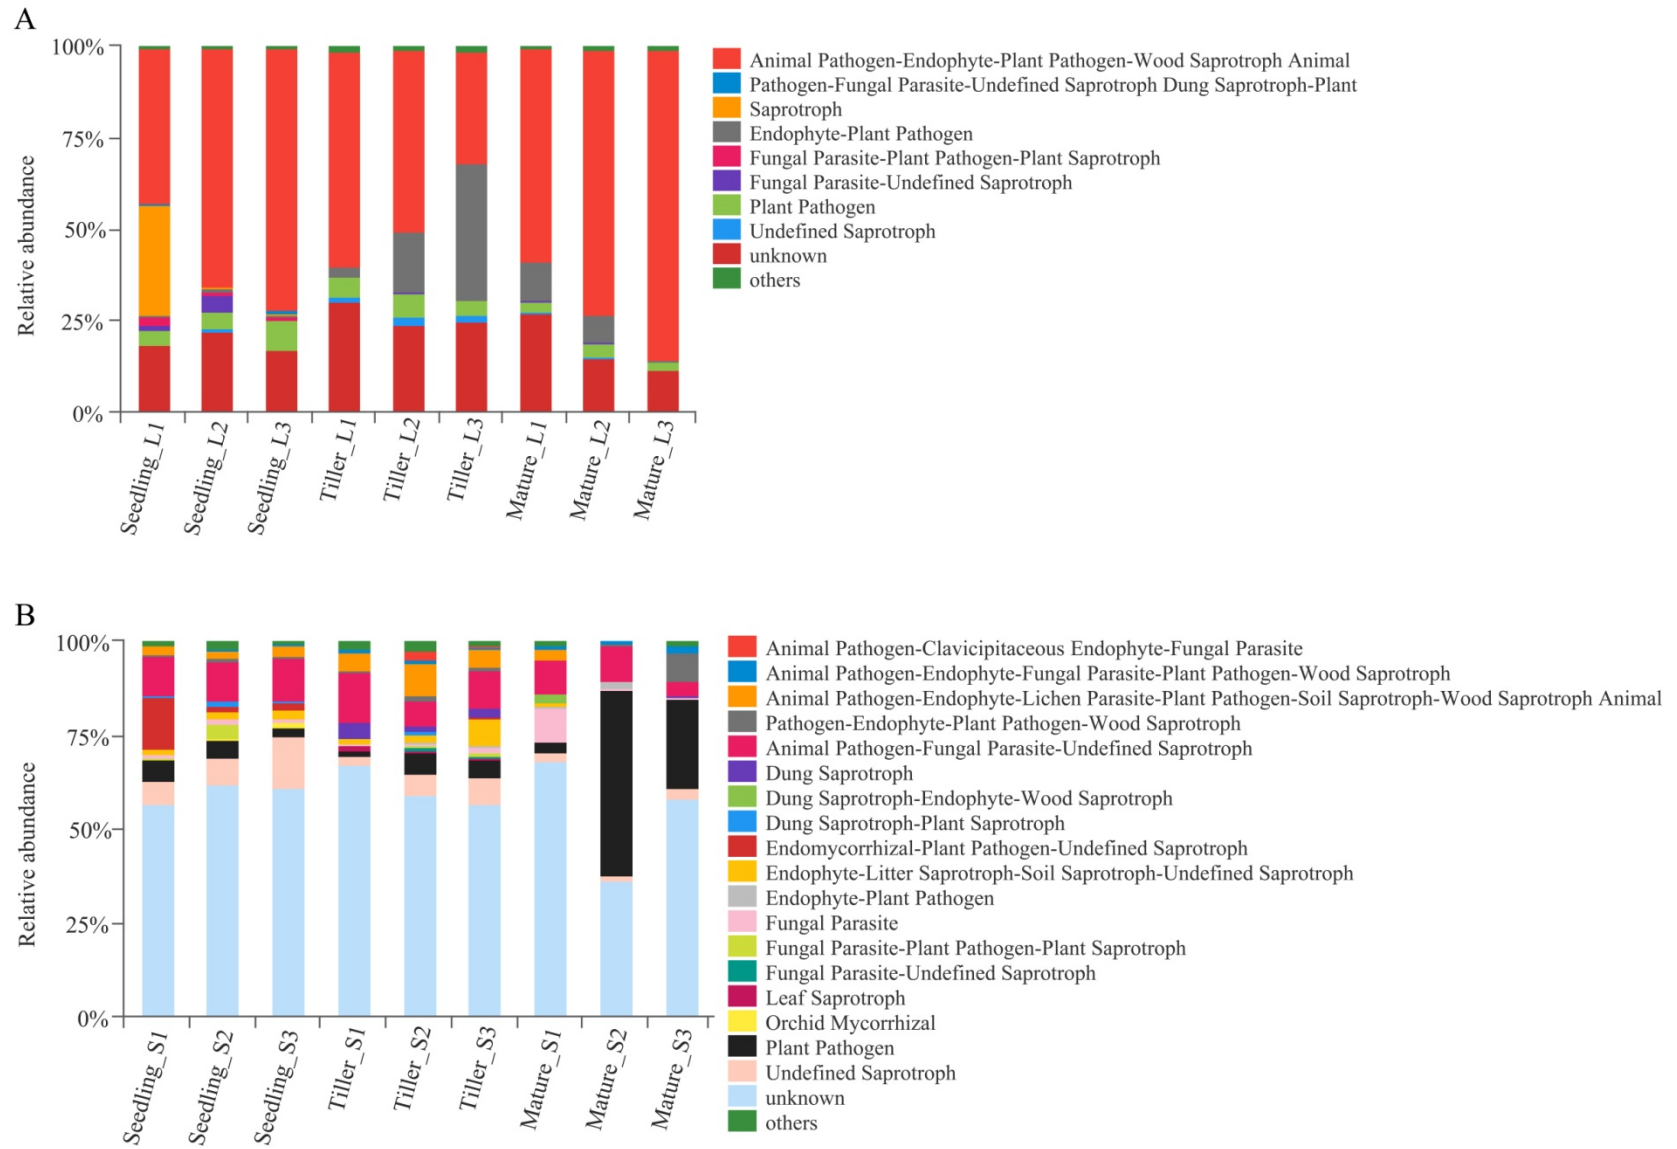

**FIGURE S4** Variations in composition of phyllosphere (A) and rhizosphere (B) fungal functional groups inferred by FunGuild during plant growth processes.
